# Supplementary material for: Temporal Repression of Core Circadian Genes Is Mediated through EARLY FLOWERING 3 in Arabidopsis
Source: PubMed Central journal article supplement (PMC3028277; doi:10.1016/j.cub.2010.12.013), 2011-01-25
Supplement: mmc1.pdf [file mmc1.pdf]

Supplemental Information

Temporal Repression of Core

Circadian Genes Is Mediated through

EARLY FLOWERING 3 in *Arabidopsis*

Laura E. Dixon, Kirsten Knox, Laszlo Kozma-Bognar, Megan M. Southern, Alexandra Pokhilko, and Andrew J. Millar

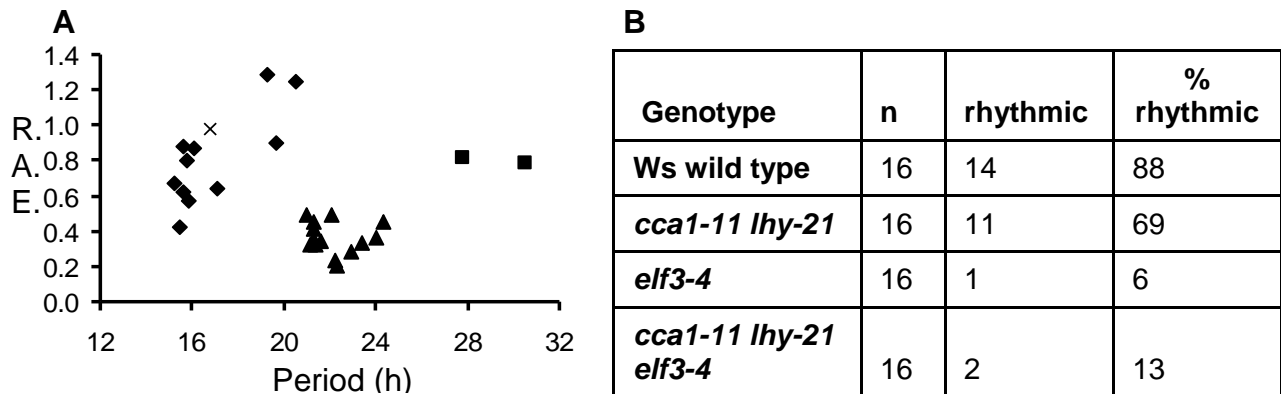

**Figure S1 (Related to Figure 1). Seedlings Carrying the *elf3-4* Mutation Are Arrhythmic in Constant Light**

Delayed chlorophyll [S1] fluorescence from 7-day old seedlings grown in 96-well multiwell plates was measured on an automated TopCount scintillation counter over 4 days in constant light. Fluorescence collected for 2 seconds per well with no count delay, from n=16 wells, each well containing 3-4 plants, combining two biologically independent experiments. Ws (filled triangles), *elf3-4* (cross), *cca1-11 lhy-21* (filled diamonds) and *cca1-11 lhy-21 elf3-3* (filled squares). Rhythmicity was assessed using FFT-NLLS analysis [S2] in the BRASS v3 software package [S3]. Rhythm robustness is represented as A) estimated period (hours) versus the relative amplitude error (RAE, where low RAE values represent robust rhythmicity and RAE=1 represents arrhythmia) and B) the number and percentage of rhythmic samples from both experiments.

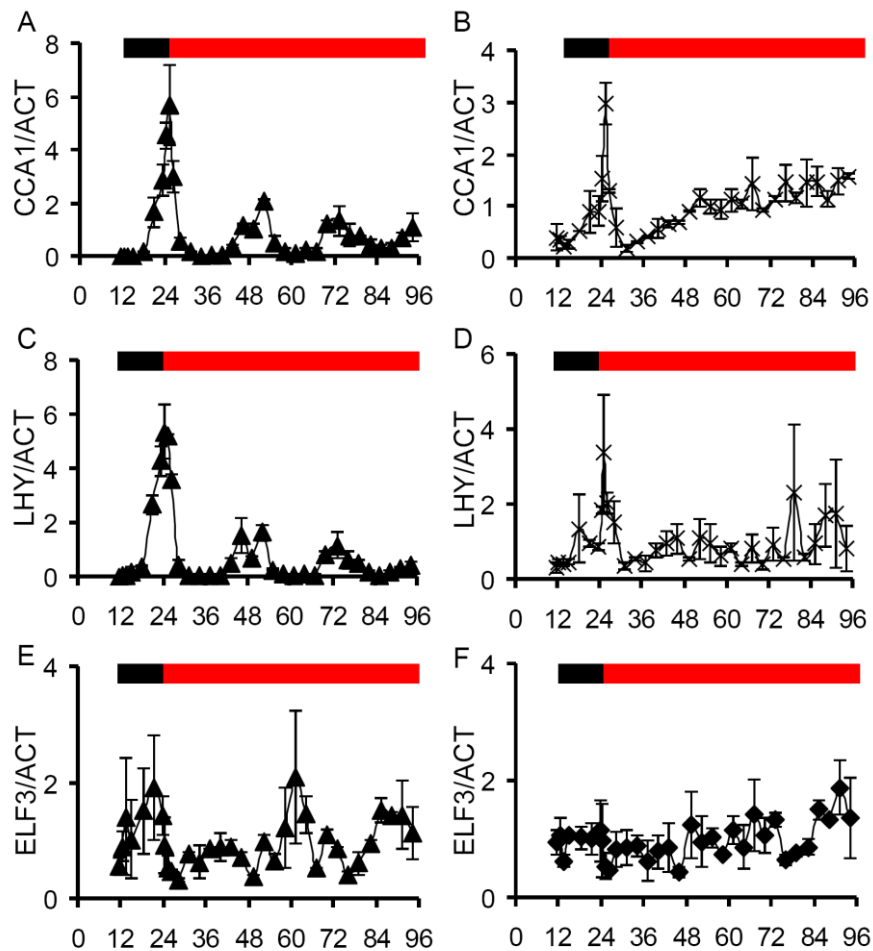

**Figure S2 (related to Figure 1). Arrhythmic Expression of *CCA1*, *LHY* and *ELF3* in Clock Mutants**

QPCR measurements of RNA levels from 12:12 red light:dark entrained 6 day old seedlings released into constant red light ( $13\text{-}20 \mu\text{mol m}^{-2} \text{s}^{-1}$ ) for *CCA1* (A, B), *LHY* (C,D) and *ELF3* (E,F), in (A, C, E.) Ws (filled triangles), (B,D) *elf3-4* (crosses) and (F) *cca1-11 lhy-21* (filled diamonds). Data are means and range of biological duplicates, with QPCR assays in technical triplicate for each sample. Expression levels are normalised to *ACTIN2*. In order to compare the expression waveforms, data have been normalised to the mean for each timeseries: note that therefore expression levels cannot be compared across panels. Relative levels in Ws and mutants are given in the main text.

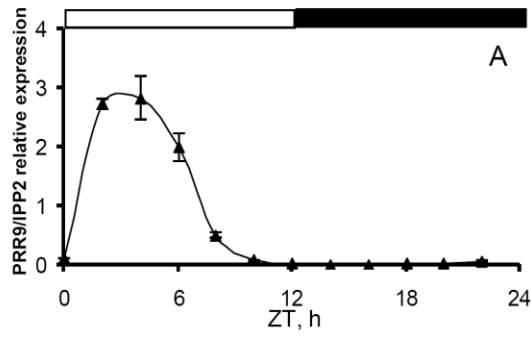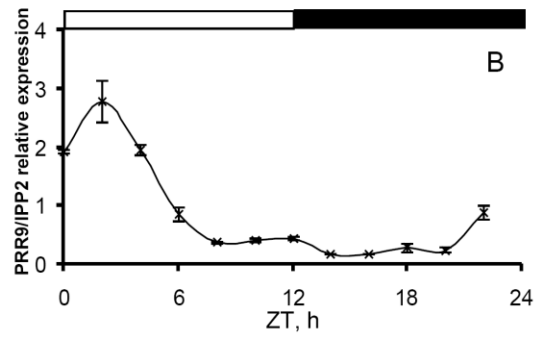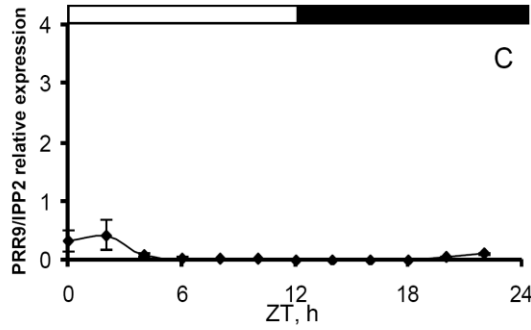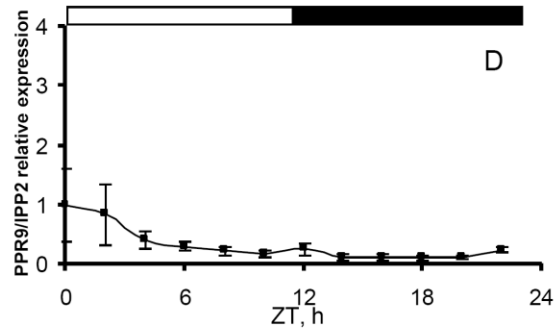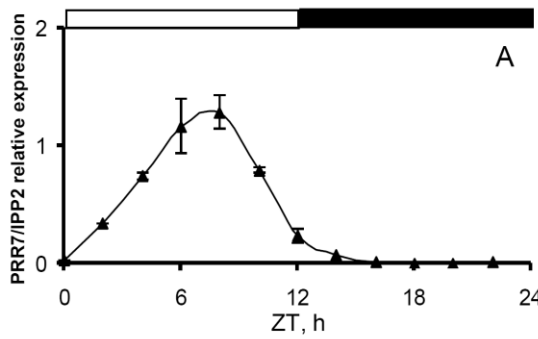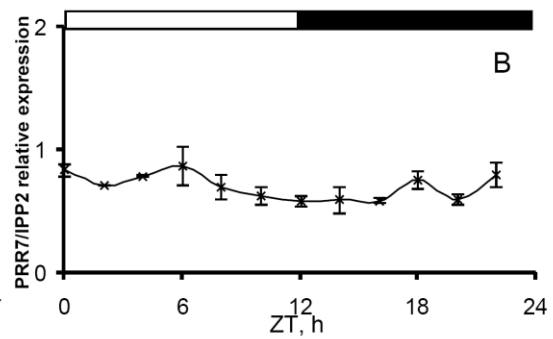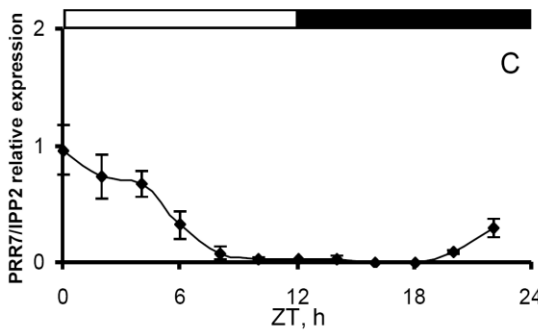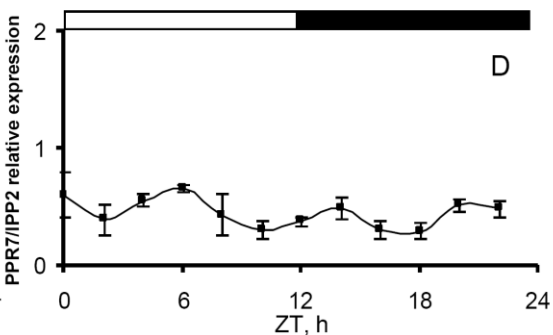

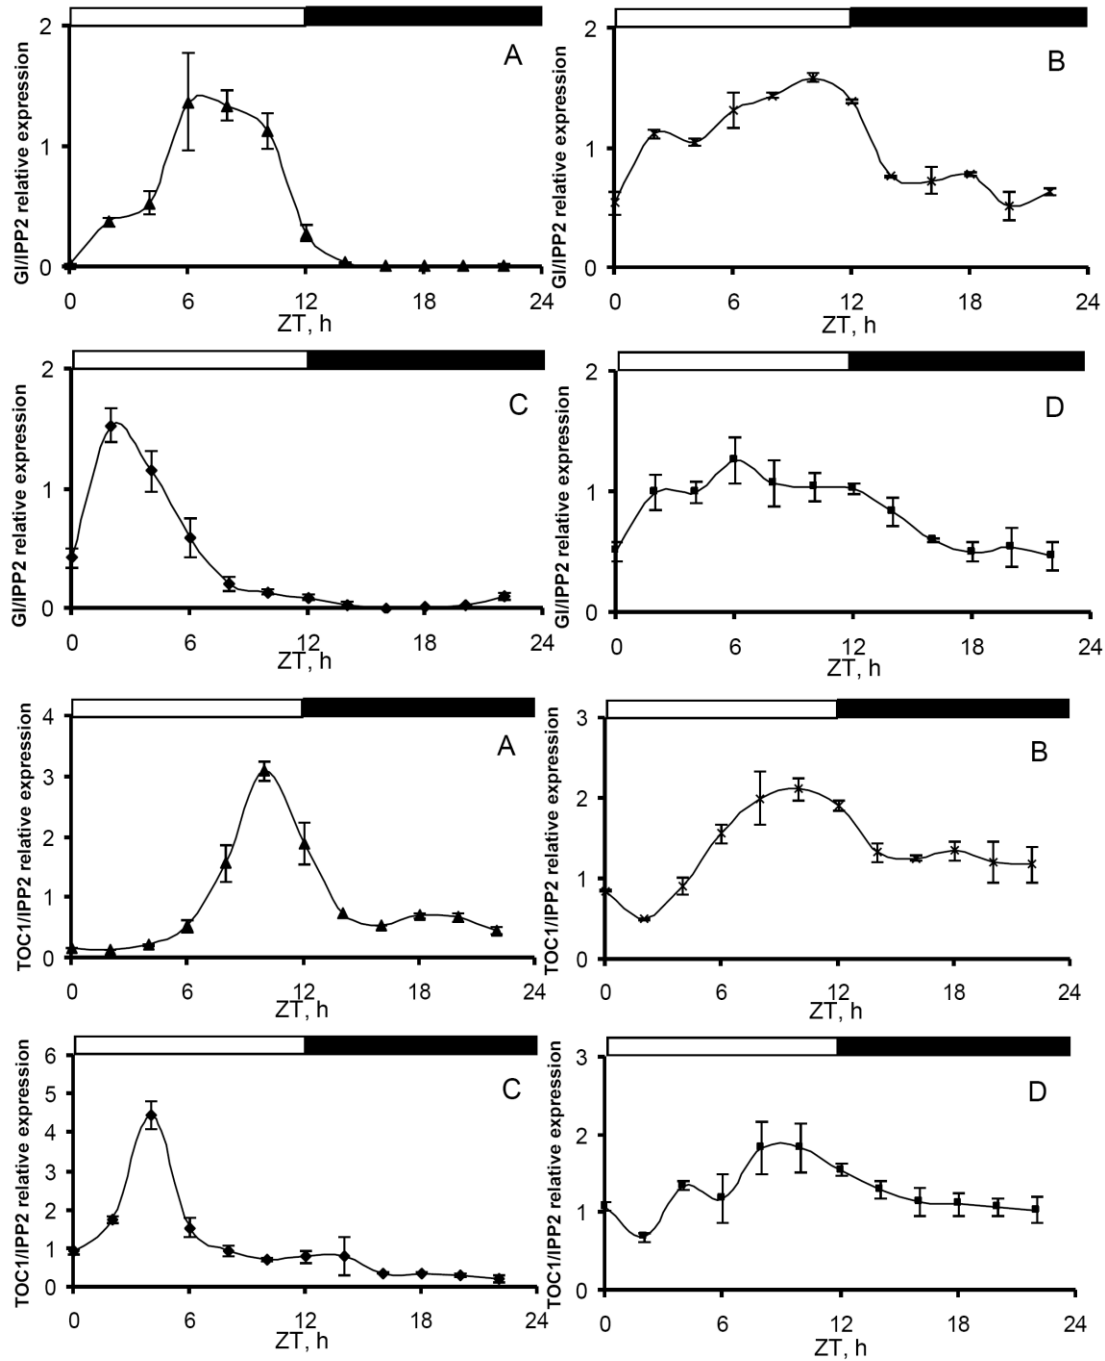

**Figure S3 (Related to Figure 2). ELF3 Regulates the Expression of Core Circadian Genes**  
 For clarity the results of Figure 2 are separated into individual plots for each gene (labelled on Y axis) and genotype (A- *Ws*; B - *elf3-4*; C - *cca1-11 lhy-21*; D - *cca1-11 lhy-21 elf3-4*). For further details, please see Figure 2 legend.

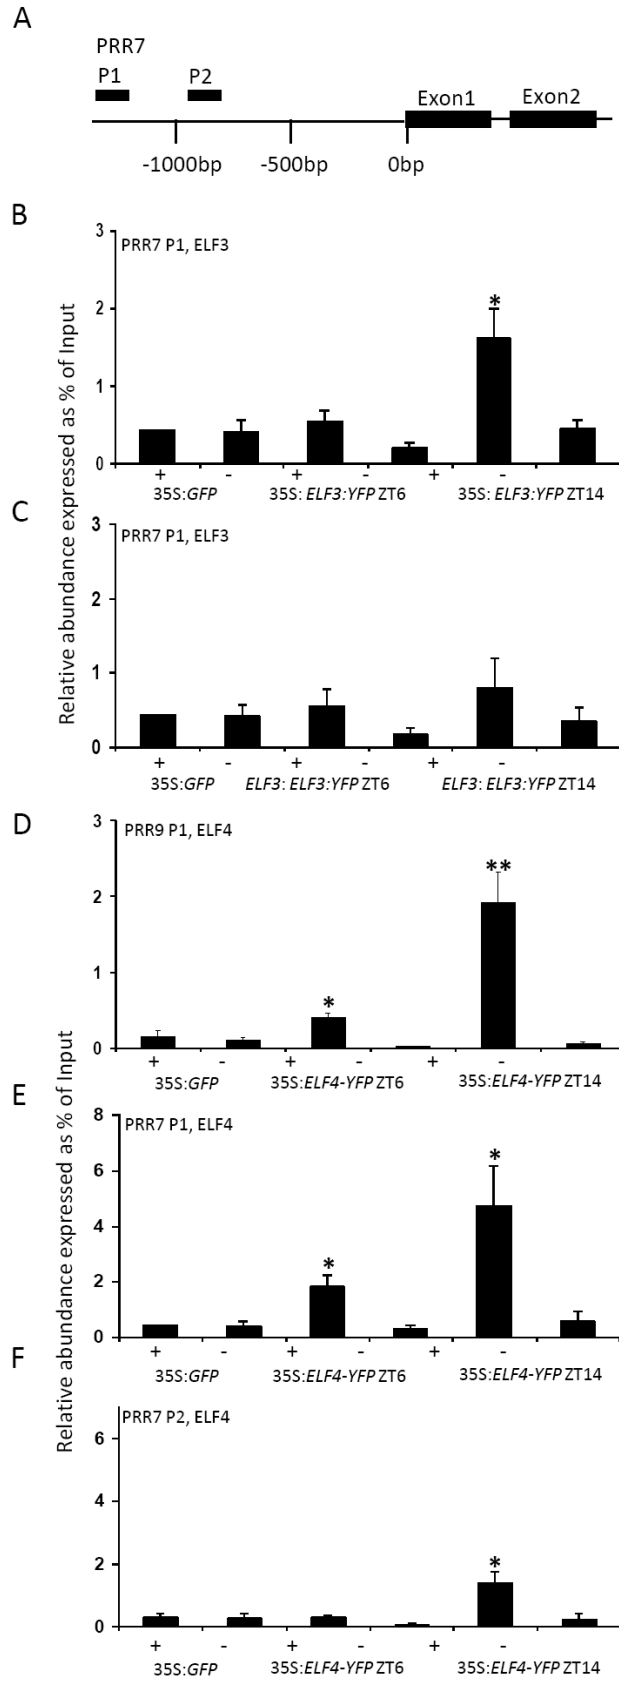

**Figure S4 (Related to Figure 3). ELF3 Associates Only Weakly with the *PRR7* Promoter and ELF4 Can Also Bind In Vivo to *PRR7* and *PRR9* Promoter Regions**

A) Schematic of the *PRR7* genomic region tested. The black bars indicate the location of the specific region amplified from ChIP DNA by primer sets *PRR7* P1 and P2.

B-F) Chromatin of 3 week old seedlings was immunoprecipitated using either no antibody (-) or anti-GFP antibody(+). Resultant DNA from 35S:*GFP* (B-F), 35S:*ELF3:YFP* (B), *ELF3:ELF3:YFP* (C) and 35S:*ELF4:YFP* (D-F), was analysed by QPCR using *PRR7* P1 (B, C & E), *PRR9* P1 (D) and *PRR7* P2 (F). Each signal is expressed as a percentage of the non-immunoprecipitated DNA (Input) extracted from the same tissue sample. Data represent the mean of at least 6 samples taken from 3 independent ChIP experiments. Error bars represent the SEM. Student's t-test was used to determine which samples had significantly different chromatin association from their no antibody control. Only samples showing a significant difference are marked \*,  $p < 0.05$  or \*\*,  $p < 0.005$ .

**Table S1. Molecular Markers Used to Detect *elf3-4*, *cca1-11* and *lhy-21* Mutations**

| Genotypes           | Fragment Lengths (bp) |               | PCR Primers              |                          |
|---------------------|-----------------------|---------------|--------------------------|--------------------------|
|                     | Wild-Type Allele      | Mutant Allele | Forward                  | Reverse                  |
| <i>ELF3/elf3-4</i>  | 11, 35, 83            | 11, 107       | <i>elf3-4</i><br>dCAPS3F | <i>elf3-4</i><br>dCAPS3R |
| <i>CCA1/cca1-11</i> | 1710                  | no product    | CCA1F                    | CCA1R                    |
|                     | no product            | ~1300         | CCA1F                    | JL270 LB<br>primer       |
| <i>LHY/lhy-21</i>   | 1671                  | no product    | LHYF1                    | LHYR1                    |
|                     | no product            | ~1600         | LHYR                     | JL270 LB<br>primer       |

All markers are PCR-based and amplified fragments were resolved by agarose gel-electrophoresis.

## Table S2. Primer Sequences Used in This Study

Sequence of primers used for genotyping *cca1-11*, *lhy-21* and *elf3-4* mutants:

***elf3-4* dCAPS3F:** 5'-AGGGCCTAGAGCTCCTCCTA-3'  
***elf3-4* dCAPS3R:** 5'-CCAGGATGAACCAAAGTGCT-3'  
**CCA1F:** 5'-AAAGCTGAATCATCTCTTCAGCCACTAGT-3'  
**CCA1R:** 5'-GCTTGCGTTTGATGTCTCT-3'  
**JL270 LB primer:** 5'-TTTCTCCATATTGACCATCATACTCATTG-3'  
**LHYF1:** 5'-CTTACCAACGAAAGTAAGTCTAAGAAAGC-3'  
**LHYR1:** 5'-AAAGATTGGAGAAGCAAATACTAACA-3'  
**LHYR:** 5'-AACCTGACATGACCAAAGAAATGTTTCGGA-3'

Sequence of primers used to amplify components of *ELF3:ELF3-YFP*, *35S:ELF3-YFP* and *35S:ELF4-YFP* constructs:

**ELF3 promoter F (EcoRI):** 5'-ATAGAATTCTGAATAACGCCAAACTTTTAGTGA-3'  
**ELF3 promoter R (SmaI):** 5'-ATACCCGGGCACTCACAATTCACAACCTTTTTC-3'  
**ELF3 CDS F (EcoRV):** 5'-CGGGATATCATGAAGAGAGGGAAAGATGAGG-3'  
**ELF3 CDS R (SmaI):** 5'-ATTACCCGGGAGGCTTAGAGGAGTCATAGCG-3'  
**ELF4 CDS F (XbaI):** 5'-CTTCTAGAATGAAGAGGAACGGCGAGA-3'  
**ELF4 CDS R (SmaI):** 5'-AAACCCGGGAGCTCTAGTTCGGCAGCA-3'

Gene specific primer pairs used in QPCR

**IPP2 F:** 5'-GTATGAGTTGCTTCTCCAGCAAAG-3'  
**IPP2 R:** 5'-GAGGATGGCTGCAACAAGTGT-3'  
**GI F:** 5'-TATTGAAGTGTCGTCTACCAG-3'  
**GI R:** 5'-GAGCTTTGGTTCATGATATCAC-3'  
**PRR9 F:** 5'-GATTGGTGGAAATTGACAAGC-3'  
**PRR9 R:** 5'-TCCTCAAATCTTGAGAAGGC-3'  
**PRR7 F:** 5'-CTTTCTCAAGGTATAATCCAGCC-3'  
**PRR7 R:** 5'-ACAATCATATGCTGCTTCAGTC-3'  
**TOC1 F:** 5'-ATCTTCGCAGAGTCCCTGTGATA-3'  
**TOC1 R:** 5'-GCACCTAGCTTCAAGCACTTTACA-3'  
**ELF3 F:** 5'-GGAAAGCCATTGCCAATCAA-3'  
**ELF3 R:** 5'-ATCCGGTGATGCAGCAATAAGT-3'  
**CCA1 F:** 5'-CTGTGTCTGACGAGGGTCGAA-3'  
**CCA1 R:** 5'-ATATGTAAAACCTTTGCGGCAATACCT-3'  
**LHY F:** 5'-CAACAGCAACAACAATGCAACTAC-3'  
**LHY R:** 5'-AGAGAGCCTGAAACGCTATACGA-3'

Primer pairs used in ChIP

**PRR9 1F:** 5'-GCCGCGATACAGAGAAAATC-3'  
**PRR91R:** 5'-TTCGATCACAACCACGAAA-3'



**PRR9 2F:** 5'-CGCCCACTAACGAAATTTGA-3'  
**PRR9 2R:** 5'-TTCAAATTGGATGGCTTTTT-3'  
**PRR9 3F:** 5'-GGATCTTTTTCTTCGTCAATGG-3'  
**PRR9 3R:** 5'-TGATGTGGACAGTGCGTAAT-3'  
**TOC1 1F:** 5'-TCTCCGGTGACTTTTTGTTGA-3'  
**TOC1 1R:** 5'-TGGCCAAATCAGAACTAGGG-3'  
**TOC1 2F:** 5'-CGTCATCTCCTTGGCCTAAA-3'  
**TOC1 2R:** 5'-CGGTGAGATGAGGAGGAGAG-3'  
**TOC1 3F:** 5'-GGAGTCTTTTGTGATGAGAAAATTG-3'  
**TOC1 3R:** 5'-GACCAAACCATCAGAAACCAA-3'  
**TOC1 4F:** 5'-GGTCGATGGCAAAACGTAAT-3'  
**TOC1 4R:** 5'-TCATCAGTGGTTGGGAAACA-3'  
**TOC1 5F:** 5'-AAGCCGCCAAATATAAACCA-3'  
**TOC1 5R:** 5'-AAATGCCCTTTTCAGACACG-3'  
**GI 1F:** 5'-CGGATGAAAACCTAAACCAGCA-3'  
**GI 1R:** 5'-CAGAAGGACCGTGACATCAA-3'  
**GI 2F:** 5'-TCTCGTTTGCTAAACCACAAAA-3'  
**GI 2R:** 5'-AAAAGCTACTTTGCCTACCTCTTT-3'  
**GI 3F:** 5'-ATCTTATTGCGCCACGTCTC-3'  
**GI 4F:** 5'-ACCACCAAACCTTGAAATAAAA-3'  
**GI 4R:** 5'-CCAAGAAAAATGTTTGCCAAT-3'  
**GI 5F:** 5'-TCTCTCTCCTAAGGCCACCA-3'  
**GI 5R:** 5'-CAATCAACCAAAAACCACGA-3'  
**GI 6F:** 5'-TTTCGTGGTTTTTGGTTGA-3'  
**GI 6R:** 5'-CGAAGCTGAATCAAACAGCTAA-3'  
**PRR5 1F:** 5'-GCCGGCCTAAACCTATTTCT-3'  
**PRR5 1R:** 5'-TGACTGGACCCTATGGTTTTTC-3'  
**PRR5 2F:** 5'-ATCCACCAAAGAACCACGAG-3'  
**PRR5 2R:** 5'-ATCAAATGGAACATGCACGA-3'  
**PRR5 3F:** 5'-CCATGTGTCCTTGATTTTCTTATG-3'  
**PRR5 3R:** 5'-ATCCCACTCGTGACTTTTGG-3'  
**CCA1 1F:** 5'-ACCCTTCATGCATGGTTAGC-3'  
**CCA1 1R:** 5'-CATTCTCGTGCGGTTCACTA-3'  
**CCA1 2F:** 5'-GTCGACAAACTGGTGGGAGA-3'  
**CCA1 2R:** 5'-TCCGGGACTACCTGAAAGG-3'  
**CCA1 3F:** 5'-TTCGTCTGGAGAAGATCTGG-3'  
**CCA1 3R:** 5'-GTCCACCTTTCACGTTGCTT-3'  
**PRR7 1F:** 5'-GCGTGAAGGAACACTGAAGG-3'  
**PRR7 1R:** 5'-ACGACGTTATCACGGAGCTT-3'  
**PRR7 2F:** 5'-TGTCGATATGTCCGAGTGGT-3'  
**PRR7 2R:** 5'-GGTGGGTAAGGAAAACGTCA-3'  
**PRR7 3F:** 5'-GGGTTTATGGCTGTGTTTTGA-3'  
**PRR7 3R:** 5'-CTCCGGTCTTTCGATCAGTG-3'

### **Supplemental References**

S1. Gould, P. D., Diaz, P., Hogben, C., Kusakina, J., Salem, R. Hartwell, J. and Hall, A. (2009). Delayed fluorescence as a universal tool for the measurement of circadian rhythms in higher plants. *Plant J.*, 58, 893-901.

S2. Plautz, J. D., Straume, M., Stanewsky, R., Jamison, C. F., Brandes, C., Dowse, H. B., Hall, J. C. and Kay, S. A. (1997). Quantitative analysis of *Drosophila* period gene transcription in living animals. *J. Biol. Rhythms*, 12, 204-217.

S3. Pokhilko, A., Hodge, S.K., Stratford, K., Knox, K., Edwards, K.D., Thomson, A.W., Mizuno, T., Millar, A.J. (2010). Data assimilation constrains new connections and components in a complex, eukaryotic circadian clock model. *Mol. Syst. Biol.*, 6: 416.
